# Supplementary material
Source: PubMed Central journal article supplement (PMC5507746)
Supplement: NIHMS854731-supplement-S1.pdf [file NIHMS854731-supplement-S1.pdf]

**Supplementary Table 1: KEGG pathway for identified biomarkers**

| Biomarker                                        | KEGG number | Primary Biological pathway/ function                                                                  |
|--------------------------------------------------|-------------|-------------------------------------------------------------------------------------------------------|
| 1-Linoleoylglycerol (1-monolinolein)             | -           | Cell signaling, energy source and storage, membrane integrity/stability                               |
| 1-Monopalmitin                                   | -           | Cell signaling, energy source and storage, membrane integrity/stability                               |
| 1-Palmitoylglycerophosphoinositol                |             | Glycerophosphoinositols                                                                               |
| 11-HETE                                          | C14780      | Arachidonic acid metabolism                                                                           |
| 12-HETE                                          | -           | Arachidonic acid metabolism                                                                           |
| 12-HHTrE                                         | -           | Arachidonic acid metabolism                                                                           |
| 12-Ketodeoxycholic acid                          | -           | Bile acid                                                                                             |
| 14,15-DiHETE                                     | -           | Arachidonic acid metabolism                                                                           |
| 14,15-DiHETrE                                    | -           | Arachidonic acid metabolism                                                                           |
| 17,18-DiHETE                                     | -           | Eicosapentaenoic acid metabolism                                                                      |
| 2-Hydroxyglutarate                               | C02630      | Butanoate metabolism; C5-branched dibasic acid metabolism                                             |
| 2-Hydroxypalmitic acid                           | -           | Cell signaling, energy source and storage, membrane integrity/stability                               |
| 2-Ketobutyric acid                               | C00109      | Amino acid metabolism (glycine, methionine, valine, leucine etc); C5-branched dibasic acid metabolism |
| 2-Monostearin                                    | -           | -                                                                                                     |
| 2-Oxoglutarate (alpha-ketoglutarate)             | C00026      | TCA cycle                                                                                             |
| 2'-Deoxycytidine                                 | C00881      | Pyrimidine metabolism                                                                                 |
| 2'-Deoxyuridine                                  | C00526      | Pyrimidine metabolism                                                                                 |
| 2'-Deoxyxanthosine                               | -           | Purine metabolism                                                                                     |
| 3-Hydroxy-2-methylbenzoic acid <i>O</i> -sulfate | -           | -                                                                                                     |
| 3-Hydroxybutanoate                               | C01089      | Synthesis and degradation of ketone bodies; Butanoate metabolism; cAMP signaling pathway              |
| 3-Hydroxyoleoylcarnitine C18:1-OH                | -           | Acylcarnitine, fatty acid $\beta$ -oxidation                                                          |
| 3-hydroxytyrosol sulfate                         |             | Tyrosols                                                                                              |
| 3-Indoxyl sulfate                                | -           | Tryptophan metabolism                                                                                 |
| 3-Oxo-octadecanoic acid                          | -           | Fatty acid biosynthesis                                                                               |
| 4-Aminobutanoate                                 | C00334      | Alanine, aspartate, butanoate, glutamate, taurine and hypotaurine metabolism                          |
| 4-Guanidinobutanoic acid                         | C01035      | Arginine and proline metabolism                                                                       |
| 4-Hydroxyphenylpyruvic acid                      | C01179      | Biosynthesis of amino acids; 2-oxocarboxylic acid metabolism                                          |
| 4-Pyridoxic acid                                 | C00847      | Vitamin B6 metabolism                                                                                 |
| 5-Hydroxy-L-tryptophan                           | C01017      | Tryptophan metabolism                                                                                 |
| 5,6-Dihydrouracil                                | C00429      | Pyrimidine metabolism                                                                                 |
| 7-Sulfocholic acid                               | -           | Dihydroxy bile acids, alcohols, and derivatives                                                       |
| 8-HETE                                           | C14776      | Arachidonic acid metabolism                                                                           |
| 9-HOTrE                                          | -           | $\alpha$ -linolenic acid metabolism                                                                   |
| Acetylcarnitine                                  | C02571      | Acylcarnitine, fatty acid $\beta$ -oxidation                                                          |
| Acetylornithine                                  | C00437      | Arginine biosynthesis; 2-oxocarboxylic acid metabolism                                                |
| Adipic acid                                      | C00322      | Lysine, tryptophan, methane metabolism; 2-oxocarboxylic acid metabolism                               |
| Adrenic acid                                     | C16527      | Biosynthesis of unsaturated fatty acids                                                               |
| Alanine                                          | C00041      | Alanine, aspartate, glutamate, cysteine, methionine metabolism; Taurine and hypotaurine metabolism    |
| Allantoin                                        | C01551      | Purine metabolism                                                                                     |
| Linoleic acid                                    | C01595      | Linoleic acid metabolism                                                                              |
| Arabinonate                                      | C00545      | Ascorbate and aldarate metabolism                                                                     |
| Arabitol                                         | C00532      | Pentose and glucuronate metabolism                                                                    |
| Arachidonic acid                                 | C00219      | Arachidonic acid metabolism                                                                           |
| Arginine                                         | C00062      | Arginine and ornithine metabolism; Aminoacyl t-RNA biosynthesis                                       |
| Asparagine                                       | C00152      | Alanine, aspartate, glutamate metabolism                                                              |
| Aspartic acid                                    | C00049      | Various amino acid metabolism pathways; Aminoacyl t-RNA biosynthesis                                  |
| Azelaic acid                                     | C08261      | Medium chain fatty acids                                                                              |
| Benzoic acid                                     | C00180      | Phenylalanine metabolism; Benzoate metabolism                                                         |
| beta-Alanine                                     | C00099      | Pyrimidine metabolism; beta-alanine metabolism; propanoate metabolism                                 |
| Betaine                                          | C00719      | Glycine, serine, and threonine metabolism                                                             |
| Butyrylcarnitine                                 | C02862      | Acylcarnitine, fatty acid $\beta$ -oxidation                                                          |
| Carnitine                                        | C00318      | Fatty acid $\beta$ -oxidation                                                                         |
| Chenodeoxycholic acid sulfate                    | -           | Monohydroxy bile acids, alcohols, and derivatives                                                     |
| ChoE(18:1)                                       | -           | Cholesteryl ester                                                                                     |
| ChoE(18:2)                                       | -           | Cholesteryl ester                                                                                     |
| ChoE(20:4)                                       | -           | Cholesteryl ester                                                                                     |
| ChoE(20:4)                                       | -           | Cholesteryl ester                                                                                     |
| ChoE(22:6)                                       | -           | Cholesteryl ester                                                                                     |
| Choline                                          | C00114      | Glycine, serine and threonine metabolism; Glycerophospholipid metabolism; Bile secretion              |
| Cinnamoylglycine                                 | -           | Excreted plant product                                                                                |
| <i>cis</i> -Aconitic acid                        | C00417      | TCA cycle                                                                                             |

|                                |                  |                                                                                                                            |
|--------------------------------|------------------|----------------------------------------------------------------------------------------------------------------------------|
| <i>cis</i> -OH Proline         | C01015           | Hydroxylated proline                                                                                                       |
| Citrate (citric acid)          | C00158           | TCA cycle                                                                                                                  |
| Citrulline                     | C00327           | Arginine biosynthesis, urea cycle                                                                                          |
| Cortisol                       | C00735           | Steroid hormone biosynthesis                                                                                               |
| Cortisone                      | C00762           | Steroid hormone biosynthesis                                                                                               |
| Creatine                       | C00300           | Glycine, serine, and threonine metabolism; Arginine and proline metabolism                                                 |
| Creatinine                     | C00791           | Arginine and proline metabolism                                                                                            |
| Cysteine                       | C00097           | Glycine, serine, and threonine metabolism; Cysteine and methionine metabolism                                              |
| Cystine                        | C00491           | Cysteine and methionine metabolism; ABC transporters                                                                       |
| Cytosine                       | C00380           | Pyrimidine metabolism                                                                                                      |
| dAMP                           | C00360           | Purine metabolism                                                                                                          |
| Decanoylcarnitine              | -                | Acylcarnitine, fatty acid $\beta$ -oxidation                                                                               |
| DG (34:1)                      | -                | Diacylglycerol                                                                                                             |
| DG (34:2)                      | -                | Diacylglycerol                                                                                                             |
| DG (36:1)                      | -                | Diacylglycerol                                                                                                             |
| DG (36:2)                      | -                | Diacylglycerol                                                                                                             |
| DG (36:3)                      | -                | Diacylglycerol                                                                                                             |
| DG (36:4)                      | -                | Diacylglycerol                                                                                                             |
| DG (44:12)                     | -                | Diacylglycerol                                                                                                             |
| DG(39:3)                       | -                | Diacylglycerol                                                                                                             |
| DG(43:3)                       | -                | Diacylglycerol                                                                                                             |
| Dihydroliipoamide              | C00579           | Glycolysis/ gluconeogenesis; TCA cycle; Alanine, aspartate, pyruvate metabolism; Valine, Leucine and Isoleucine metabolism |
| Dimethylglycine                | C01026           | Glycine, serine, and threonine metabolism                                                                                  |
| Dityrosine                     | -                | Amino acid biosynthesis                                                                                                    |
| Docosahexaenoic acid           | C06429           | Biosynthesis of unsaturated fatty acids                                                                                    |
| Dodecanedioic acid             | C02678           | Fatty acid $\beta$ -oxidation                                                                                              |
| Eicosapentanoate (EPA; 20:5n3) | C06428           | Eicosapentaenoic acid metabolism (precursor)                                                                               |
| ePC (24:0)                     | -                | Ether linked phosphatidylcholine                                                                                           |
| ePC (30:0)                     | -                | Ether linked phosphatidylcholine                                                                                           |
| ePC (32:2)                     | -                | Ether linked phosphatidylcholine                                                                                           |
| ePC (34:2)                     | -                | Ether linked phosphatidylcholine                                                                                           |
| ePC (34:4)                     | -                | Ether linked phosphatidylcholine                                                                                           |
| ePC (36:1)                     | -                | Ether linked phosphatidylcholine                                                                                           |
| ePC (36:2)                     | -                | Ether linked phosphatidylcholine                                                                                           |
| ePC (36:5)                     | -                | Ether linked phosphatidylcholine                                                                                           |
| ePC (40:6)                     | -                | Ether linked phosphatidylcholine                                                                                           |
| ePC (42:4)                     | -                | Ether linked phosphatidylcholine                                                                                           |
| ePE (34:3)                     | -                | Ether linked phosphatidylcholine                                                                                           |
| ePE (36:2)                     | -                | Ether linked phosphatidylcholine                                                                                           |
| ePE (36:3)                     | -                | Ether linked phosphatidylcholine                                                                                           |
| ePE (36:4)                     | -                | Ether linked phosphatidylcholine                                                                                           |
| ePE (38:5)                     | -                | Ether linked phosphatidylcholine                                                                                           |
| ePE (38:6)                     | -                | Ether linked phosphatidylcholine                                                                                           |
| ePE (38:7)                     | -                | Ether linked phosphatidylcholine                                                                                           |
| ePE (40:5)                     | -                | Ether linked phosphatidylcholine                                                                                           |
| ePE (40:7)                     | -                | Ether linked phosphatidylcholine                                                                                           |
| ePE (40:8)                     | -                | Ether linked phosphatidylcholine                                                                                           |
| Equol sulfate                  | C14131 for equol | Isoflavanol                                                                                                                |
| Ferulic acid                   | C01494           | Phenylpropanoid biosynthesis                                                                                               |
| Flavin mononucleotide          | C00061           | Oxidative phosphorylation; Riboflavin metabolism                                                                           |
| Fructose                       | C00095           | Fructose and mannose metabolism                                                                                            |
| Fucose                         | C01019           | Fructose and mannose metabolism; Amino acid and nucleotide sugar metabolism                                                |
| Fumarate/ Fumaric acid         | C00122           | TCA cycle                                                                                                                  |
| Gentisic acid                  | C00628           | Tyrosine metabolism                                                                                                        |
| Glucarate                      | C00818           | Ascorbate and aldarate metabolism                                                                                          |
| Gluconic acid                  | C00257           | Pentose phosphate pathway                                                                                                  |
| Glucose                        | C00031           | Glycolysis/ Gluconeogenesis; Pentose phosphate pathway; Amino acid and nucleotide sugar metabolism                         |
| Glucuronic acid                | C00191           | Pentose and glucuronate interconversions; Ascorbate and aldarate metabolism                                                |
| Glutaconic acid                | C02214           | Cell signaling, energy source and storage, membrane integrity/stability                                                    |
| Glutamate/ Glutamic acid       | C00025           | Various amino acid metabolism; Glutathione metabolism; C5-branched chain amino acid metabolism                             |
| Glutamine                      | C00064           | Arginine, alanine, aspartate, glutamate metabolism; Purine and pyrimidine metabolism                                       |
| Glyceric acid                  | C00258           | Pentose phosphate pathway; Glycine, serine, threonine metabolism; Glycerolipid metabolism                                  |

|                                         |                |                                                                                                                 |
|-----------------------------------------|----------------|-----------------------------------------------------------------------------------------------------------------|
| Glycerol                                | C00116         | Pentose and glucuronate interconversions; Glycerolipid metabolism; Galactose metabolism                         |
| Glycerol-3-phosphate                    | C00093         | Glycerolipid metabolism; Glycerophospholipid metabolism                                                         |
| Glycine                                 | C00037         | Bile acid biosynthesis; Purine metabolism; Glycine, serine, threonine, lysine, thiamine, glutathione metabolism |
| Glycolic acid                           | C00160         | Glyoxylate and dicarboxylate metabolism                                                                         |
| Glyoxylic acid                          | C00048         | Purine metabolism; Glycine, serine, threonine, arginine, proline, methane metabolism                            |
| Gulonolactone                           | C01040         | Ascorbate and aldarate metabolism                                                                               |
| Heme                                    | C00032         | Porphyrin and chlorophyll metabolism                                                                            |
| Hexanoylcarnitine                       | -              | Acylcarnitine, fatty acid $\beta$ -oxidation                                                                    |
| Hexanoylglycine                         | -              | Fatty acid $\beta$ -oxidation                                                                                   |
| Hippurate (Hippuric acid)               | C01586         | Phenylalanine metabolism                                                                                        |
| Histidine                               | C00135         | Histidine, beta-alanine metabolism; Aminoacyl t-RNA biosynthesis                                                |
| Homogentisic acid                       | C00544         | Ubiquinone biosynthesis; Tyrosine metabolism                                                                    |
| Homotachydrine                          | C08283         | Alkaloid derived from ornithine, phytochemical                                                                  |
| Hydroquinone                            | C00530         | Tyrosine metabolism; Riboflavin metabolism                                                                      |
| Hypoxanthine                            | C00262         | Purine metabolism                                                                                               |
| Indole-3-acetamide                      | C02693         | Tryptophan metabolism                                                                                           |
| Indole-3-carboxylic acid                | C19837         | Tryptophan metabolism                                                                                           |
| Indole-3-pyruvate                       | C00331         | Tryptophan metabolism                                                                                           |
| Indoleacetic acid                       | C00954         | Tryptophan metabolism                                                                                           |
| Indolelactate                           | C02043         | Tryptophan metabolism                                                                                           |
| Indolepropionate                        | -              | Tryptophan metabolism                                                                                           |
| Inositol                                | C00137         | Galactose metabolism; Ascorbate and aldarate metabolism; Inositol phosphate metabolism                          |
| Isovalerylglycine                       | -              | Fatty acid $\beta$ -oxidation                                                                                   |
| Isethionic acid                         | C05123         | Taurine and hypotaurine metabolism                                                                              |
| Isobutyryl-L-carnitine/butyrylcarnitine | -              | Acylcarnitine, fatty acid $\beta$ -oxidation                                                                    |
| Isocitrate                              | C00311         | TCA cycle                                                                                                       |
| Isoleucine/Leucine                      | C00407/ C00123 | Valine, leucine, isoleucine metabolism; Aminoacyl t-RNA biosynthesis                                            |
| Kynurenic acid                          | C01717         | Tryptophan metabolism                                                                                           |
| L-Alloisoleucine                        | -              | Isoleucine transamination                                                                                       |
